# Supplementary material
Source: Springer Nature journal article supplement (https://www.springermedizin.de/resource/supplementary/13002_2009_157_MOESM6_ESM.pdf/9627278)

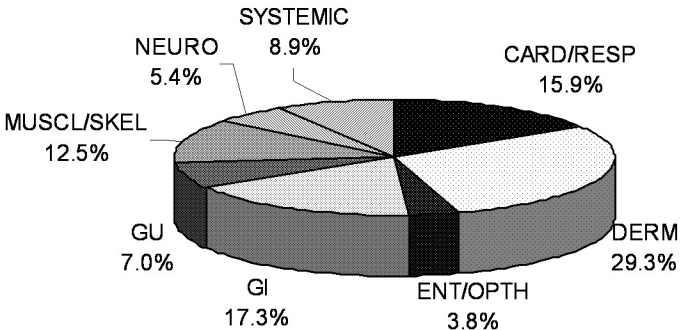

## Kwamalasamutu

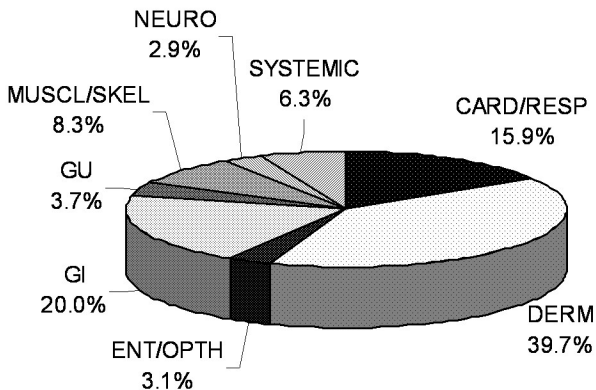

## Përëre Tëpu

Supplement: MOESM6 [file 9627278]
